# Supplementary material for: Effects of Ten Different Exercise Interventions on Motor Function in Parkinson’s Disease Patients—A Network Meta-Analysis of Randomized Controlled Trials
Source: MDPI journal article supplement (doi:10.3390/brainsci12060698), 2022-05-27
Supplement: s1 [file s1]

**Supplementary Table S1.** Risk of bias for each included studies.

| Study     | Random<br>sequence<br>generation | Allocation<br>concealment | Blinding of<br>participants<br>and personnel | Blinding of<br>outcome<br>assessment | Incomplete<br>outcome data | Selective<br>reporting | Other bias | Overall Score<br>(Category) |
|-----------|----------------------------------|---------------------------|----------------------------------------------|--------------------------------------|----------------------------|------------------------|------------|-----------------------------|
| Vivas     | Low                              | Unclear                   | Unclear                                      | Unclear                              | High                       | Low                    | Low        | 4<br>(moderate)             |
| Carroll   | Low                              | Low                       | High                                         | Unclear                              | High                       | Low                    | Low        | 3<br>(moderate)             |
| Volpe     | Low                              | Low                       | High                                         | Low                                  | Low                        | Low                    | Low        | 1<br>(low)                  |
| Volpe     | Low                              | Low                       | Low                                          | Unclear                              | Low                        | Low                    | Low        | 1<br>(low)                  |
| Perez-de  | Low                              | Unclear                   | Low                                          | Unclear                              | Low                        | Low                    | Low        | 2<br>(low)                  |
| Kurt      | Low                              | Unclear                   | Low                                          | Unclear                              | Low                        | Low                    | Low        | 2<br>(low)                  |
| Wang      | Low                              | Unclear                   | Low                                          | Unclear                              | Low                        | Low                    | Low        | 2<br>(low)                  |
| Palamara  | Low                              | Low                       | Low                                          | Unclear                              | Low                        | Low                    | Low        | 1<br>(low)                  |
| Clerici   | Low                              | Low                       | Unclear                                      | Unclear                              | High                       | Low                    | Low        | 3<br>(moderate)             |
| Yuan      | Unclear                          | Low                       | High                                         | High                                 | Low                        | Low                    | Unclear    | 4<br>(moderate)             |
| Pazzaglia | Low                              | Low                       | High                                         | High                                 | Low                        | Low                    | Unclear    | 3                           |

|             |         |         |         |         |         |         |         |                 |
|-------------|---------|---------|---------|---------|---------|---------|---------|-----------------|
| Xia         | Low     | Unclear | High    | Unclear | Low     | Low     | High    | 4<br>(moderate) |
| Santos      | High    | Unclear | High    | Unclear | Low     | Low     | Unclear | 5<br>(moderate) |
| Tollar      | Low     | Low     | High    | High    | Low     | Low     | Low     | 2<br>(high)     |
| Song        | Low     | Low     | High    | Unclear | High    | Low     | Low     | 3<br>(low)      |
| Lee         | Unclear | Unclear | High    | Unclear | Unclear | Low     | Low     | 5<br>(moderate) |
| Li          | Low     | Unclear | Unclear | Low     | Low     | Low     | Unclear | 3<br>(high)     |
| Vieira      | Unclear | Unclear | High    | Low     | Low     | Unclear | Unclear | 5<br>(moderate) |
| De lima     | Low     | Low     | High    | Low     | Low     | Unclear | Unclear | 3<br>(high)     |
| Kwok        | Low     | Low     | High    | Low     | Low     | Low     | Unclear | 2<br>(moderate) |
| Leal        | Low     | Low     | High    | Low     | Low     | Unclear | Unclear | 3<br>(low)      |
| Schlenstedt | Low     | Low     | High    | Low     | Low     | Unclear | Unclear | 3<br>(moderate) |
| Tang        | Low     | Unclear | Unclear | Unclear | Low     | Unclear | Unclear | 5<br>(moderate) |
| Choi        | Unclear | Unclear | Unclear | Low     | Low     | Low     | Unclear | 4<br>(high)     |

|              |         |         |         |         |         |         |         |            |
|--------------|---------|---------|---------|---------|---------|---------|---------|------------|
|              |         |         |         |         |         |         |         | (moderate) |
| Amano        | Unclear | Unclear | High    | Low     | Low     | Low     | Low     | 3          |
|              |         |         |         |         |         |         |         | (moderate) |
| Hackney      | Low     | Low     | Low     | Low     | Low     | Unclear | Unclear | 2          |
|              |         |         |         |         |         |         |         | (low)      |
| Vergara-Diaz | Low     | Low     | High    | Low     | Low     | Low     | Unclear | 2          |
|              |         |         |         |         |         |         |         | (low)      |
| Li           | Low     | Unclear | Unclear | Low     | Low     | Low     | Unclear | 3          |
|              |         |         |         |         |         |         |         | (moderate) |
| Choi         | Unclear | Unclear | Unclear | Low     | Unclear | Low     | Unclear | 5          |
|              |         |         |         |         |         |         |         | (high)     |
| Gao          | Low     | Unclear | High    | Low     | Low     | Low     | Unclear | 3          |
|              |         |         |         |         |         |         |         | (moderate) |
| You          | Low     | Low     | High    | Low     | Low     | Low     | Unclear | 2          |
|              |         |         |         |         |         |         |         | (low)      |
| Xiao         | Low     | Unclear | Unclear | Low     | Low     | Low     | Unclear | 3          |
|              |         |         |         |         |         |         |         | (moderate) |
| Shi          | Unclear | Unclear | Unclear | Low     | Unclear | Low     | Unclear | 5          |
|              |         |         |         |         |         |         |         | (high)     |
| Wang         | Low     | Low     | High    | Unclear | High    | Low     | Unclear | 4          |
|              |         |         |         |         |         |         |         | (moderate) |
| Marieke      | Unclear | Unclear | High    | Low     | Low     | Low     | Low     | 3          |
|              |         |         |         |         |         |         |         | (moderate) |
| Cheung       | Low     | Unclear | Unclear | Low     | Low     | Low     | Unclear | 3          |
|              |         |         |         |         |         |         |         | (moderate) |
| Kwok         | Low     | Low     | High    | Low     | Low     | Low     | Unclear | 1          |

|          |         |         |         |         |         |         |         |            |
|----------|---------|---------|---------|---------|---------|---------|---------|------------|
|          |         |         |         |         |         |         |         | (low)      |
| Khuzema  | Low     | Low     | Low     | High    | Low     | Low     | Unclear | 2          |
|          |         |         |         |         |         |         |         | (low)      |
| Ni       | Low     | Low     | Unclear | High    | Low     | Low     | Unclear | 3          |
|          |         |         |         |         |         |         |         | (moderate) |
| Sharma   | Unclear | Unclear | Unclear | Unclear | Unclear | Low     | Unclear | 6          |
|          |         |         |         |         |         |         |         | (high)     |
| Song     | Low     | Low     | High    | Low     | Low     | Low     | Unclear | 2          |
|          |         |         |         |         |         |         |         | (low)      |
| Michels  | Low     | Low     | Unclear | Low     | Low     | Unclear | Unclear | 3          |
|          |         |         |         |         |         |         |         | (moderate) |
| Volpe    | Low     | Low     | High    | Low     | Unclear | Low     | Unclear | 3          |
|          |         |         |         |         |         |         |         | (moderate) |
| Shanahan | Unclear | Low     | Low     | Low     | Unclear | Low     | Unclear | 3          |
|          |         |         |         |         |         |         |         | (moderate) |
| Hackney  | Low     | Low     | Low     | Low     | Low     | Unclear | Unclear | 2          |
|          |         |         |         |         |         |         |         | (low)      |
| Rawson   | High    | Unclear | Unclear | Low     | Low     | Low     | Unclear | 4          |
|          |         |         |         |         |         |         |         | (moderate) |
| Duncan   | Low     | Low     | Unclear | Low     | Low     | Low     | Unclear | 2          |
|          |         |         |         |         |         |         |         | (low)      |
| Solla    | Low     | Low     | High    | High    | Low     | Low     | Unclear | 3          |
|          |         |         |         |         |         |         |         | (moderate) |
| Romenets | Low     | Low     | High    | High    | Low     | Low     | Unclear | 3          |
|          |         |         |         |         |         |         |         | (moderate) |
| Shulman  | Low     | Low     | High    | Low     | Low     | Low     | Unclear | 2          |

|          |         |         |         |         |         |         |         |                 |
|----------|---------|---------|---------|---------|---------|---------|---------|-----------------|
|          |         |         |         |         |         |         |         | (low)           |
| Carvalho | Unclear | Unclear | High    | Low     | Low     | Low     | Low     | 3<br>(moderate) |
| Sage     | Unclear | Unclear | Unclear | Low     | Low     | Low     | Unclear | 4<br>(moderate) |
| Cugusia  | Unclear | Unclear | Unclear | Unclear | Unclear | Low     | Low     | 5<br>(high)     |
| Bang     | Unclear | Low     | High    | Low     | Low     | Low     | Unclear | 3<br>(moderate) |
| Bello    | Unclear | 7<br>(high)     |
| Kolk     | Low     | Low     | Low     | Low     | Low     | Low     | Unclear | 1<br>(low)      |
| Sacheli  | Unclear | Unclear | High    | Low     | Low     | Low     | Unclear | 2<br>(low)      |
| Ridgel   | Unclear | Unclear | Unclear | Unclear | Low     | Low     | Unclear | 5<br>(high)     |
| Arcolin  | Unclear | Unclear | Unclear | Unclear | Low     | Low     | Unclear | 5<br>(high)     |
| Tollar   | Low     | Low     | High    | Low     | Low     | Unclear | Unclear | 3<br>(moderate) |

**Supplementary Table S2.** Consistency test for UPDRS.

|          | Coef.     | Std. Err. | z     | P> z  | [95% Conf. Interval] |          |
|----------|-----------|-----------|-------|-------|----------------------|----------|
| B VS CON | -.1622021 | 1.781536  | -0.09 | 0.927 | -3.653948            | 3.329544 |
| C VS CON | 1.531016  | 1.216439  | 1.26  | 0.208 | -.8531614            | 3.915193 |
| D VS CON | 2.932478  | 1.249295  | 2.35  | 0.109 | .4839043             | 5.381052 |
| E VS CON | -.7685721 | 1.963292  | -0.39 | 0.695 | -4.616555            | 3.07941  |
| F VS CON | -1.968178 | 1.849176  | -1.06 | 0.287 | -5.592496            | 1.656141 |
| G VS CON | .9447259  | 2.08785   | 0.45  | 0.651 | -3.147385            | 5.036837 |
| H VS CON | 1.234108  | 1.986855  | 0.62  | 0.535 | -2.660056            | 5.128273 |
| I VS CON | -1.326081 | 1.695263  | -0.78 | 0.434 | -4.648735            | 1.996574 |
| J VS CON | -1.188614 | 2.062386  | -0.58 | 0.564 | -5.230816            | 2.853589 |
| K VS CON | -1.85778  | 2.500079  | -0.74 | 0.457 | -6.757844            | 3.042284 |
| L VS CON | -1.579226 | 2.125342  | -0.74 | 0.457 | -5.744821            | 2.586368 |

**Supplementary Table S3.** Consistency test for TUGT.

|          | Coef.     | Std. Err. | z     | P> z  | [95% Conf. Interval] |          |
|----------|-----------|-----------|-------|-------|----------------------|----------|
| B VS CON | 1.568637  | 2.208094  | 0.71  | 0.477 | -2.759149            | 5.896422 |
| C VS CON | 1.776689  | .693302   | 2.56  | 0.100 | .4178419             | 3.135536 |
| D VS CON | 1.668695  | .8337112  | 2.00  | 0.075 | .0346509             | 3.302739 |
| E VS CON | .789449   | 1.312764  | 0.60  | 0.548 | -1.783521            | 3.362419 |
| F VS CON | .4265893  | 1.046139  | 0.41  | 0.683 | -1.623804            | 2.476983 |
| G VS CON | -.5216772 | .9407811  | -0.55 | 0.579 | -2.365574            | 1.32222  |
| H VS CON | .1040121  | .9621334  | 0.11  | 0.914 | -1.781735            | 1.989759 |
| I VS CON | .2529556  | 1.113036  | 0.23  | 0.820 | -1.928555            | 2.434467 |
| J VS CON | .3596071  | 1.270027  | 0.28  | 0.777 | -2.129601            | 2.848815 |
| K VS CON | .6015271  | 1.239753  | 0.49  | 0.628 | -1.828345            | 3.031399 |
| L VS CON | -.7282505 | 1.192294  | -0.61 | 0.541 | -3.065103            | 1.608602 |

**Supplementary Table S4.** Consistency test for BBS.

|          | Coef.     | Std. Err. | z     | P> z  | [95% Conf. Interval] |          |
|----------|-----------|-----------|-------|-------|----------------------|----------|
| B VS CON | 3.287298  | 2.856736  | 1.15  | 0.250 | -2.311802            | 8.886398 |
| C VS CON | -2.221698 | 1.518548  | -1.46 | 0.143 | -5.197996            | .7546014 |
| D VS CON | -.958803  | 2.031787  | -0.47 | 0.637 | -4.941032            | 3.023426 |
| E VS CON | 1.400826  | 2.918556  | 0.48  | 0.631 | -4.319439            | 7.12109  |
| F VS CON | 4.851568  | 2.659363  | 1.82  | 0.068 | -.3606886            | 10.06382 |
| G VS CON | 3.941234  | 3.523446  | 1.12  | 0.263 | -2.964593            | 10.84706 |
| H VS CON | 2.540235  | 2.723636  | 0.93  | 0.351 | -2.797993            | 7.878464 |
| I VS CON | -.2192184 | 3.563543  | -0.06 | 0.951 | -7.203634            | 6.765197 |
| J VS CON | 2.643499  | 2.438002  | 1.08  | 0.278 | -2.134897            | 7.421895 |
| K VS CON | 2.357567  | 3.8503    | 0.61  | 0.540 | -5.188883            | 9.904016 |
| L VS CON | 2.484526  | 2.88599   | 0.86  | 0.389 | -3.17191             | 8.140963 |
